# Supplementary material for: Antigenic Variant of Highly Pathogenic Avian Influenza A(H7N9) Virus, China, 2019
Source: Emerg Infect Dis. 2020 Feb;26(2):379–80. doi: 10.3201/eid2602.191105 (PMC6986829; doi:10.3201/eid2602.191105)
Supplement: Appendix — Supplemental data from study of antigenic variant of highly pathogenic avian influenza A(H7N9) virus in China, 2019. [file 19-1105-Techapp-s1.pdf]

# Antigenic Variant of Highly Pathogenic Avian Influenza A(H7N9) Virus, China, 2019

## Appendix

**Appendix Table.** Virulence and shedding of H7N9 highly pathogenic avian influenza viruses in ducks

| Isolate | Day post challenge | No. necropsy | Virus isolation                        |     |     |     |     |     | Virus shedding                         |         | Seroconversion (positive/total) |
|---------|--------------------|--------------|----------------------------------------|-----|-----|-----|-----|-----|----------------------------------------|---------|---------------------------------|
|         |                    |              | Positive number/total number (Mean Ct) |     |     |     |     |     | Number shedding/total number (Mean Ct) |         |                                 |
|         |                    |              |                                        |     |     |     |     |     | Tracheal                               | Cloacal |                                 |
| FQ2     | 3                  | 5            | 1/5                                    | 2/5 | 2/5 | 2/5 | 5/5 | 2/5 | 10/10                                  | 10/10   | 10/10                           |
|         | 5                  | 5            | 1/5                                    | 2/5 | 2/5 | 2/5 | 5/5 | 2/5 | 10/10                                  | 10/10   |                                 |
| DL1     | 3                  | 5            | 1/5                                    | 2/5 | 3/5 | 3/5 | 5/5 | 2/5 | 10/10                                  | 10/10   | 10/10                           |
|         | 5                  | 5            | 1/5                                    | 2/5 | 3/5 | 3/5 | 5/5 | 2/5 | 10/10                                  | 10/10   |                                 |

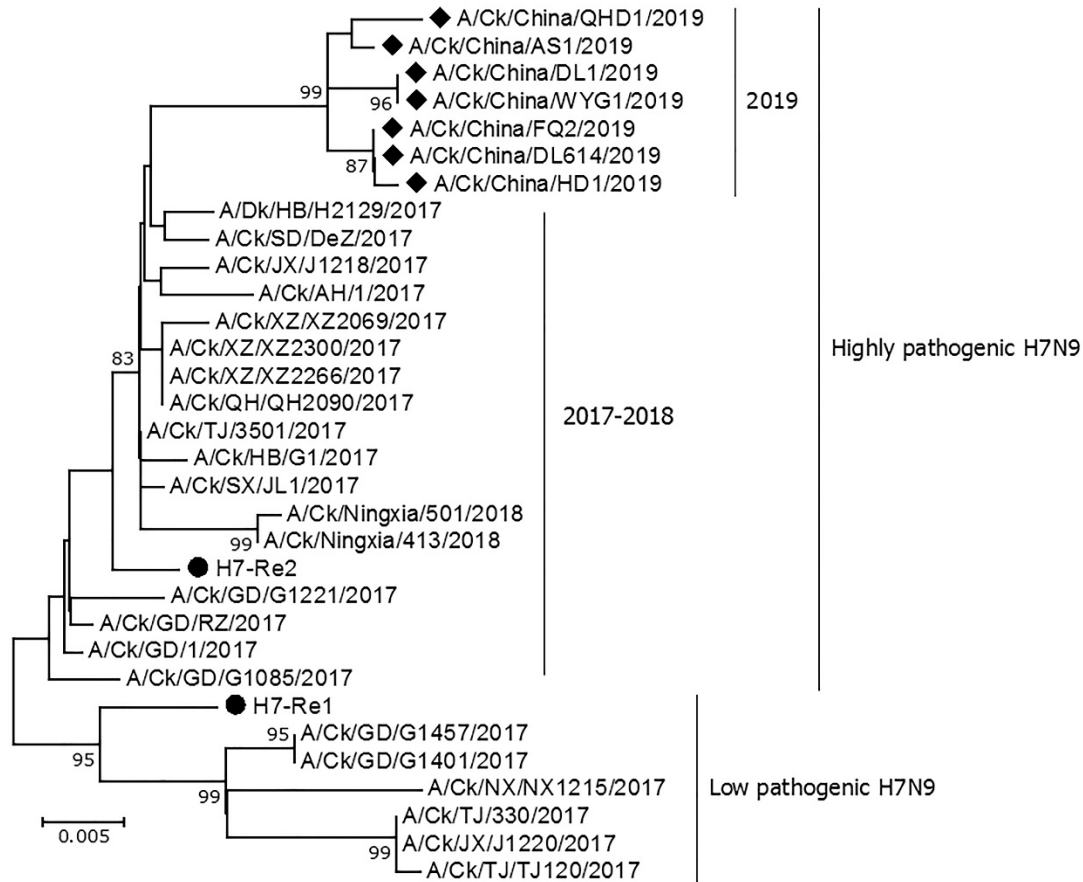

**Appendix Figure.** Phylogenetic trees of the hemagglutinin gene of H7N9 avian influenza viruses. Trees were constructed with MEGA6.05 software using the neighbor-joining method. Bootstrap analysis was performed with 1,000 replications. “◆”represents viruses isolated in 2019 and “●”represents vaccine strains. Scale bars indicate the number of nucleotide substitutions per site.
